# Supplementary material
Source: bioRxiv or medRxiv preprint supplement (https://medrxiv.org/highwire/filestream/87674/field_highwire_adjunct_files/0/2020.06.22.20134957-1.pdf)
Supplement: Supplementary file [file 2020.06.22.20134957-1.pdf]

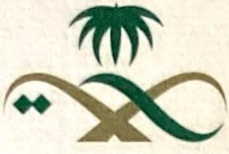

وزارة الصحة  
Ministry of Health

H-03-M-084

Institutional Review Board, General Directorate of Health Affairs in Madinah

To *Dr. Khalid Mohammed Ghalilah*

This is to certify that Institutional Review Board (IRB), General Directorate of Health Affairs in Madinah has reviewed all the submitted updated and amended Documents from the ethical point view and has approved your study titled: *Effects of Anticoagulant and Corticosteroids therapy in patients affected by severe COVID-19 Pneumonia* The committee is fully compliant with the conditions and principles of good clinical practice. The committee is constituted in accordance with the WHO and ICH-GCP guidelines and works according to written Standard Operating Procedures.

The IRB recommended granting permission of approval to conduct the project along the following terms:

1. If there are any further amendments, they must be approved prior to implementation unless they are intended to reduce risk.
2. Monitoring: the project may be subject to an audit or any other form of monitoring by the REC.
3. All unanticipated or serious adverse events must be reported to the REC within 5 days or according to the protocol
4. Inform the IRB prior to making prospective changes to the study procedure
5. Upon the study completion, The PI is expected to submit a final report at the end of the study

Please note that this approval is valid for one year commencing from the date of this letter.

Head OF IRB Committee

Dr. Abdulhameed Alsubhi

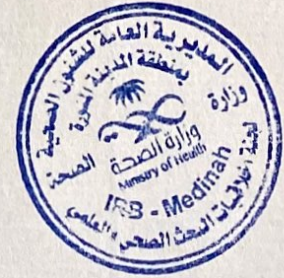

/ المشفوعات

1/9/1441 H

/ التاريخ

الرقم / IRB 450

H-03-M-084

Institutional Review Board, General Directorate of Health Affairs in Madinah

To *Dr. Khalid Mohammed Ghalilah*

This is to certify that Institutional Review Board (IRB), General Directorate of Health Affairs in Madinah has reviewed all the submitted updated and amended Documents from the ethical point view and has approved your study titled: *Effects of Anticoagulant and Corticosteroids therapy in patients affected by severe COVID-19 Pneumonia* The committee is fully compliant with the conditions and principles of good clinical practice. The committee is constituted in accordance with the WHO and ICH-GCP guidelines and works according to written Standard Operating Procedures.

The IRB recommended granting permission of approval to conduct the project along the following terms:

1. If there are any further amendments, they must be approved prior to implementation unless they are intended to reduce risk.
2. Monitoring: the project may be subject to an audit or any other form of monitoring by the REC.
3. All unanticipated or serious adverse events must be reported to the REC within 5 days or according to the protocol
4. Inform the IRB prior to making prospective changes to the study procedure
5. Upon the study completion, The PI is expected to submit a final report at the end of the study

Please note that this approval is valid for one year commencing from the date of this letter.

Head OF IRB Committee

Dr. Abdulhameed Alsubhi

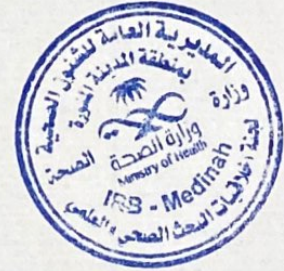

/ المشفوعات

1/9/1441 H

/ التاريخ

الرقم / IRB 450
